# Supplementary material for: Development of EST-SSR markers based on transcriptome for genetic analysis in Radix Ardisia
Source: PeerJ. 2025 Jun 17;13:e19560. doi: 10.7717/peerj.19560 (PMC12180450; doi:10.7717/peerj.19560)
Supplement: Supplemental Information 5 [file peerj-13-19560-s005.xlsx]

## Sheet: EST-SSR marker in this study
Primer ID	Sequence(5’ to 3’)	Tm
SSR1	F:5’-CAGAATCATGGCCCCTCGTT-3’	60.107
	R:5’-AGGCAGTCCAAGCATGAGAC-3’	60.036
SSR4	F:5’-TTGTAGTGATCGCCCTGCTC -3’	59.824
	R:5’-AAAAAGCAAGCCCGCCAAC-3’	60.228
SSR5	F:5’-TGCTGGAGATGGTGCAAGTT -3’	59.889
	R:5’-TGCCAGTGCACAGTGATGTA-3’	59.604
SSR8	F:5’-TGAAAGGTGACCAAGGACGG-3’	59.892
	R:5’-GATGGTGTTCCTCCTGCTGT-3’	59.892
SSR11	F:5’-CCCAAACCATTCCACTCTGAGA-3’	59.96
	R:5’-CGGGGATTGAGTACGACGAG-3’	59.971
SSR12	F:5’-TGCATTGCATGGGCCAAAAA-3’	59.89
	R:5’-GAGGGCTTGAAAGGGTGTCT-3’	59.598
SSR13	F:5’-CAATCTTCCCGCTTAGTTAGGC-3’	59.127
	R:5’-GAGCTCTACCACTGGCTTCC-3’	59.823
SSR19	F:5’-TGCGCCAAGAACAAAACTTT-3’	57.336
	R:5’-AACGATCTGTATTGGCCCGA-3’	59.172
SSR26	F:5’-ATTCGGAAGCTGCACCCTTT-3’	60.251
	R:5’-AGTTGTGTGTTTCCAGCCGA-3’	60.107
SSR27	F:5’-GGGGCATGTCAATCTGGTCA-3’	60.034
	R:5’-TGTGAGGAGAGAGTGGGGAG-3’	59.96
SSR30	F:5’-TGCCAATAAAAGCCCTAACTCA-3’	57.959
	R:5’-CACCCACCTCTGATTGGACC-3’	60.035
SSR32	F:5’-GTGAGTGGTGAGAAGGTGGG-3’	59.965
	F:5’-ACGCGCGTATCAGTAACGAT-3’	59.971
SSR39	F:5’-CGAGCAAAAGCTGAGATCCC-3’	58.987
	F:5’-TGAGCATGGGAAGTCCTCCT-3’	60.253
SSR41	F:5’-AAAGGGGCGGATTCAACCAT-3’	59.959
	R:5’-GCAACCCTCCTCCGATCTC-3’	59.556
SSR43	F:5’-TGGAGCCACTATTCATACCACG-3’	59.898
	R:5’-AGGGTTAACGCGAGATTCACA-3’	59.726
SSR47	F:5’-TGGAGAATGCGGACACCAAA-3’	59.89
	R:5’-AGTCCTGACTCCCGACACTA-3’	59.303
SSR51	F:5’-TCACCCCTTATTTGCTGTCGA-3’	59.374
	R:5’-TAATGACATGGGTGTGGGCC-3’	60.034
SSR52	F:5’-AGCATAGAGGTTTGGCAGGT-3’	59.005
	R:5’-AAACCACATCCATCCACCCC-3’	59.959
SSR53	F:5’-TAGTGTTTGCTGGGGTGTGG-3’	60.179
	R:5’-GCAGGAATCGCAAAGCACAA-3’	60.039
SSR54	F:5’-AGCCCTAAATTGCTCATCGGA-3’	59.51
	R:5’-GGCACTTCGAGAAGCCCTAG-3’	60.179
SSR55	F:5’-AACTGGAGGAGAAATGGCAC-3’	57.793
	R:5’-CATCAGGTCCTCAGCAGCAA-3’	60.036
SSR59	F:5’-CGCGCTTGTGTACTTTGTGG-3’	60.384
	R:5’-TGGTTTGGGTGTGGAATCCC-3’	60.179
SSR63	F:5’-TGTTGCACACTCTGATCTGGA-3’	59.306
	R:5’-GCGTCCCGAATCCCTAGAAA-3’	59.537
SSR66	F:5’-AACAAGGGGGATAACGCTCA-3’	59.011
	R:5’-GGTACCTAGGTTGTCCGGCT-3’	60.975
SSR67	F:5’-TGCGGACTCTTCGATTCCTC-3’	59.544
	R:5’-AATCGGGGCCTATGAGCATG-3’	59.963
SSR68	F:5’-GTCAATGACCAAACACAGCCT-3’	59.044
	R:5’-TGGGTGAGAGTCTGTTGCTG-3’	59.606
SSR69	F:5’-GTTTGGACGGTGACAACACG-3’	59.973
	R:5’-AGTGAAATGTGGCATTCGCA-3’	58.753
SSR70	F:5’-AGGGTGACTAATGGGAATGCC-3’	59.785
	R:5’-TCACCGTAAGTAGGGGTACA-3’	57.103
SSR71	F:5’-ACCCAACGTCTGCAGAAACA-3’	60.107
	R:5’-AGAGTGCAACCAATACCCCA-3’	58.928
SSR72	F:5’-ACAACAGAACCAAACCAGGA-3’	57.181
	R:5’-CTTCCGGTCTTTTGTGGGGT-3’	60.179
SSR76	F:5’-TGGGGTGCTAAATGTCGTGT-3’	59.601
	R:5’-GGTAAGGGCCAAGGGAGCTA-3’	60.987
SSR77	F:5’-ACAATTTTAGGTACGGCGGC-3’	58.911
	R:5’-GCAGCCATGCGCAAATTCTA-3’	59.899
SSR78	F:5’-GGATAGAGGCGGCGATATCG-3’	59.97
	R:5’-TTTTGGCGGGTCGGGGTG-3’	62.959
SSR79	F:5’-AACACTGAACCAGATGCCGA-3’	59.604
	R:5’TTGGGTTGTTGGGTTGGGAA--3’	59.957
SSR86	F:5’-TAGCCGCGTCAACATTAGCA-3’	60.109
	R:5’-CAATCACGAACACGCCTTCC-3’	59.834
SSR89	F:5’-GGCTCTCTAGTTTGGTGGCA-3’	59.675
	R:5’-CCTGCTTCCCCCGCAAATTA-3’	60.683
SSR91	F:5’-ACCCTCCTAGACCTCGCAAT-3’	60.032
	R:5’-CGCCTTCATGGATGCATTCG-3’	60.041
SSR96	F:5’-GAACACGGAGAGCCTTAGCC-3’	60.46
	R:5’-GTCCGTTGTCGCTATCCCAA-3’	60.109
SSR97	F:5’-GCTGAAGGCATTGGTGGAGA-3’	60.323
	R:5’-ATGCAGCCACGTTTGACAGA-3’	60.535
SSR98	F:5’-GAAGAGGGCTCGGGTGAATT-3’	59.747
	R:5’ACGTACACAAAAAGCAGCACT-3’	58.986
SSR99	F:5’-TCGTGGGGGAATTAGTTATGGA-3’	58.614
	R:5’-AGAGACACAAGCAGAGCACC-3’	59.965
SSR100	F:5’-TCAGGAACCAGCAAAAACAACA-3’	59.171
	R:5’-ATGACAGTCGCAACAGGAGG-3’	60.037
SSR102	F:5’-GCGAGGTGCAAGAGAAGTTG-3’	59.485
	R:5’-CACACAAGTGCCCTGACTTT-3’	58.607
SSR103	F:5’-ATGCTTTGGCCTTTGGATGT-3’	58.352
	R:5’-CGTCACATTGCAACTTGAAGGT-3’	59.967
SSR104	F:5’TGAGGTGGACGGTTTCGAAG--3’	59.967
	R:5’-AGTTGAGCTCAAACTCGCCT-3’	59.605
SSR109	F:5’-ACAGGTCACGGAATCCTCAA-3’	58.652
	R:5’-GCATTTGGCTGGTGGCTAAG-3’	59.826
SSR112	F:5’-TCCAAACTCACACGTCAGCA-3’	59.823
	R:5’-AGCCGAAAAAGGGATGAGGA-3’	59.008
SSR115	F:5’-CCGCCGAAAGAGTATCGTACA-3’	59.935
	R:5’-AGCCCATTTTTGTTACCGCT-3’	58.372
SSR117	F:5’-AGCAGATGTGGAGGTACACC-3’	59.095
	R:5’-CAGCTCACAGGATTCCCCAG-3’	60.107
SSR118	F:5’-AGGCCAACACGTACACAACA-3’	60.108
	R:5’-TTCAGCGATCCCATCTTCCG-3’	59.895
SSR119	F:5’-TGCTCTAGAGGTTGGGTTCG-3’	59.104
	R:5’-CCATAACGCCATGGTGTCCT-3’	60.107
