# Supplementary material for: Development of EST-SSR markers based on transcriptome for genetic analysis in Radix Ardisia
Source: PeerJ. 2025 Jun 17;13:e19560. doi: 10.7717/peerj.19560 (PMC12180450; doi:10.7717/peerj.19560)
Supplement: Supplemental Information 7 [file peerj-13-19560-s007.xlsx]

## Sheet: 20221112遗传距离
#HL01
#ZS01	0.325952
#HL02	0.148011	0.229766
#ZS02	0.311991	0.298967	0.22683
#ZS03	0.322092	0.340817	0.212834	0.23836
#XB01	0.480973	0.564363	0.41464	0.548379	0.592382
#ZS04	0.405294	0.402742	0.316076	0.29347	0.33024	0.587615
#ZS05	0.343772	0.356724	0.213969	0.338659	0.376159	0.480973	0.18215
#HS01	0.448186	0.542026	0.46641	0.535611	0.485088	0.503755	0.574847	0.532743
#HS02	0.503844	0.56583	0.494669	0.544527	0.58972	0.414231	0.549861	0.568382	0.383764
#ZS06	0.396302	0.481719	0.335834	0.31257	0.402714	0.632691	0.377781	0.370326	0.589151	0.440786
#ZS07	0.361631	0.439121	0.327138	0.278556	0.422189	0.591205	0.369085	0.336313	0.642975	0.490931	0.139724
#BH01	0.598502	0.664943	0.53526	0.658529	0.49678	0.598502	0.608152	0.626673	0.544912	0.588919	0.545014	0.536318
#BH02	0.585514	0.616864	0.470979	0.584916	0.483792	0.642673	0.654005	0.558115	0.483134	0.604919	0.532027	0.549306	0.169334
#BH03	0.604872	0.60232	0.490336	0.575286	0.451856	0.66203	0.643509	0.550804	0.551281	0.654129	0.501373	0.542688	0.173424	0.101595
#HL03	0.441673	0.473023	0.432499	0.470928	0.48103	0.729355	0.423153	0.414274	0.580455	0.655234	0.314078	0.329479	0.644532	0.549306	0.542688
#ZS08	0.405425	0.397482	0.318288	0.49285	0.413339	0.615145	0.471461	0.432824	0.541752	0.611293	0.329325	0.450683	0.527469	0.46447	0.45973	0.296532
#ZS09	0.351226	0.471735	0.342052	0.497069	0.44465	0.621517	0.473784	0.462452	0.574847	0.549861	0.351806	0.369085	0.525914	0.512926	0.532284	0.34311	0.106002
#HL04	0.387241	0.555189	0.325422	0.443895	0.366985	0.564171	0.42429	0.360572	0.46641	0.463897	0.311141	0.352456	0.509285	0.496297	0.54163	0.327138	0.293596	0.218438
#HL05	0.41464	0.481081	0.325422	0.385054	0.395155	0.630863	0.342052	0.334597	0.553421	0.559207	0.335834	0.327138	0.561929	0.522273	0.54163	0.327138	0.343606	0.266066	0.138836
#HL06	0.405294	0.508102	0.316076	0.434549	0.414797	0.554825	0.332706	0.325251	0.485235	0.485323	0.377781	0.369085	0.525914	0.436941	0.48099	0.423153	0.386904	0.30673	0.195448	0.12949
#BL01	0.624212	0.716971	0.585185	0.695668	0.705769	0.43184	0.605692	0.624212	0.483611	0.419404	0.591927	0.642071	0.488745	0.475757	0.495115	0.612218	0.603369	0.605692	0.500627	0.585185	0.41332
#BL02	0.601986	0.655524	0.533971	0.673442	0.616852	0.409615	0.678776	0.601986	0.594916	0.423154	0.514131	0.561005	0.55961	0.498994	0.472889	0.650617	0.610996	0.645986	0.592812	0.655332	0.524625	0.280055
#HL07	0.448186	0.616133	0.386367	0.474987	0.347887	0.532743	0.544075	0.475585	0.499956	0.524842	0.448072	0.439376	0.472591	0.459603	0.433498	0.493444	0.457195	0.377021	0.336357	0.412343	0.327011	0.508929	0.486703
#GG01	0.568382	0.56583	0.526418	0.615986	0.626087	0.473072	0.618854	0.568382	0.524842	0.294239	0.499627	0.553451	0.588919	0.493693	0.539719	0.586241	0.482081	0.517072	0.559207	0.593109	0.454551	0.419404	0.347168	0.437831
#GG02	0.625116	0.655354	0.553421	0.70551	0.679244	0.503755	0.639386	0.625116	0.555526	0.383764	0.53031	0.611227	0.520219	0.557242	0.602575	0.611227	0.541752	0.574847	0.494581	0.553421	0.485235	0.388301	0.389064	0.527355	0.192708
#HL08	0.351226	0.471735	0.266066	0.320138	0.385809	0.492305	0.386773	0.351226	0.485235	0.454551	0.277698	0.34311	0.579981	0.539595	0.48099	0.269002	0.28425	0.281412	0.241968	0.290759	0.281412	0.491281	0.496454	0.327011	0.424698	0.429665
#ZJ01	0.726899	0.878498	0.648732	0.782471	0.679244	0.657906	0.782486	0.726899	0.778669	0.555614	0.502139	0.642975	0.622873	0.724296	0.684813	0.709667	0.541752	0.544075	0.584193	0.682633	0.606596	0.64613	0.539346	0.499956	0.524842	0.527355	0.485235
#BH04	0.529902	0.750493	0.493328	0.654467	0.539405	0.616913	0.693702	0.679433	0.581672	0.641679	0.556456	0.575931	0.280775	0.249769	0.287145	0.665544	0.511512	0.457314	0.46666	0.493328	0.431338	0.513235	0.54102	0.427521	0.579159	0.63883	0.511381	0.63883
#HL09	0.283044	0.481163	0.27387	0.398559	0.43606	0.540873	0.465194	0.378354	0.592644	0.503119	0.265147	0.323893	0.57836	0.565372	0.510621	0.27843	0.269581	0.264524	0.27387	0.296859	0.311044	0.569703	0.520808	0.357804	0.445961	0.455442	0.177512	0.508086	0.484442
#ZS10	0.414231	0.452501	0.349487	0.415315	0.487937	0.473072	0.549861	0.443219	0.555614	0.46609	0.332573	0.376521	0.617907	0.604919	0.567118	0.43209	0.341003	0.313473	0.349487	0.376886	0.395711	0.586459	0.477221	0.357788	0.376478	0.437831	0.189859	0.466002	0.520319	0.179332
#ZS11	0.39577	0.498578	0.332528	0.425024	0.435126	0.482781	0.377249	0.341702	0.534551	0.415174	0.316964	0.38623	0.543058	0.55747	0.52276	0.359561	0.299418	0.271888	0.306552	0.256542	0.271888	0.537327	0.459531	0.342179	0.386187	0.420141	0.154105	0.44754	0.530028	0.167988	0.134872
#LZ01	0.623995	0.621443	0.46067	0.566238	0.57634	0.469844	0.605474	0.559456	0.611227	0.461078	0.525387	0.516691	0.511001	0.498013	0.42206	0.546544	0.478853	0.540936	0.51951	0.550282	0.480311	0.449699	0.332163	0.466045	0.461078	0.493444	0.395754	0.521615	0.493693	0.447507	0.43209	0.38623
#BH05	0.544395	0.724165	0.535221	0.702862	0.614523	0.631407	0.708196	0.662178	0.596166	0.593653	0.57095	0.562254	0.313618	0.30063	0.28362	0.534855	0.526006	0.525875	0.535221	0.507822	0.471807	0.527729	0.481405	0.466112	0.534812	0.596166	0.395822	0.624336	0.245017	0.450145	0.452574	0.386297	0.361584
#ZS12	0.494753	0.565813	0.423058	0.503688	0.479888	0.561445	0.476233	0.432233	0.546524	0.558782	0.399947	0.480864	0.606921	0.624705	0.583437	0.36308	0.354231	0.383859	0.256004	0.336047	0.354872	0.576391	0.493541	0.396992	0.523691	0.514775	0.22134	0.546524	0.53832	0.275069	0.280069	0.187124	0.391251	0.411735
#BL03	1.1948	1.00992	1.01857	1.13704	1.24245	1.1948	1.17628	0.953636	1.07951	0.98999	1.13434	0.971495	0.87701	1.04634	1.00116	1.12565	1.03675	1.00922	1.01857	1.09861	1.08927	0.99803	1.1189	0.936414	1.07003	1.15956	1.08927	1.00541	1.05972	0.944544	0.98999	0.925591	0.902502	1.00522	0.949151
#ZS13	0.525691	0.516708	0.395155	0.375561	0.446287	0.558481	0.50717	0.433318	0.577461	0.554628	0.348647	0.366619	0.637858	0.595018	0.557216	0.339951	0.385168	0.385809	0.286942	0.339586	0.385809	0.576557	0.495491	0.427929	0.554628	0.577461	0.252278	0.610251	0.569258	0.281909	0.233045	0.218061	0.451177	0.469341	0.243499	0.905981
#BL04	0.641247	0.632264	0.539699	0.58349	0.695374	0.337564	0.689417	0.609498	0.571656	0.453961	0.636053	0.596585	0.561042	0.548055	0.518622	0.596585	0.618507	0.655516	0.569552	0.632072	0.590977	0.381958	0.359732	0.516086	0.453961	0.463443	0.473194	0.661268	0.625973	0.497548	0.482132	0.436271	0.308903	0.458145	0.441293	0.770223	0.389993
#BL05	0.582355	0.653415	0.541432	0.59129	0.636483	0.378756	0.665617	0.615145	0.602377	0.39507	0.60891	0.600214	0.635682	0.594524	0.613881	0.600214	0.624154	0.596624	0.51066	0.573181	0.501314	0.323067	0.300841	0.484594	0.423241	0.457195	0.442474	0.571605	0.567082	0.465325	0.423241	0.37738	0.396615	0.399254	0.382402	0.829114	0.385168	0.17222
#GG03	0.648901	0.631082	0.601986	0.630366	0.640467	0.539702	0.669601	0.611161	0.591472	0.403508	0.675456	0.592652	0.585178	0.701402	0.686858	0.705981	0.657911	0.669601	0.565619	0.639727	0.59264	0.523877	0.501651	0.557571	0.313896	0.321182	0.556273	0.626564	0.611888	0.565701	0.501948	0.477756	0.49087	0.561843	0.394418	0.659145	0.458145	0.39138	0.360659
#BL06	0.718634	0.730471	0.640467	0.734986	0.707347	0.585103	0.700114	0.718634	0.735313	0.547349	0.580886	0.634711	0.729019	0.686178	0.59431	0.57219	0.594112	0.631121	0.486316	0.486316	0.47697	0.403025	0.313358	0.576249	0.486725	0.439048	0.47697	0.576249	0.546008	0.499822	0.486725	0.439275	0.355126	0.48254	0.388727	1.07125	0.419665	0.35754	0.298648	0.424143
#ZS14	0.471798	0.517448	0.405465	0.443895	0.453996	0.665954	0.612342	0.596961	0.648732	0.559207	0.413796	0.4051	0.646486	0.604511	0.595697	0.46067	0.45182	0.48313	0.433636	0.462624	0.453277	0.645809	0.533971	0.439011	0.559207	0.553421	0.316076	0.553421	0.493328	0.296859	0.246833	0.332528	0.432499	0.42986	0.336047	1.01857	0.312917	0.510711	0.45182	0.530527	0.404078
#ZJ02	0.957735	0.955183	0.843199	1.01776	0.967238	0.903667	0.785063	0.757064	1.0095	0.865914	0.830139	0.870233	0.978272	1.01407	0.938121	0.774923	0.812593	0.785063	0.843199	0.794409	0.785063	0.870451	0.894745	0.808834	0.865914	0.904144	0.694091	0.721823	0.909671	0.729953	0.674858	0.561965	0.687912	0.833193	0.634019	0.868517	0.709409	0.780513	0.766073	0.752039	0.756118	0.703438
#XB02	0.781624	0.730282	0.731628	0.683046	0.776529	0.433318	0.850115	0.824184	0.715612	0.554628	0.728136	0.719441	0.733169	0.754082	0.675	0.6817	0.67285	0.683061	0.692407	0.731628	0.722282	0.517717	0.413253	0.610251	0.520727	0.577461	0.573862	0.644153	0.664568	0.585591	0.520727	0.530436	0.451177	0.553899	0.513789	0.980089	0.446287	0.289909	0.331101	0.425356	0.314304	0.583208	0.709409
#DF01	0.62215	0.59762	0.576608	0.602134	0.538128	0.51679	0.64137	0.62215	0.53577	0.548029	0.612338	0.603642	0.626939	0.6457	0.602537	0.603642	0.493009	0.532171	0.612976	0.650716	0.567262	0.565638	0.512641	0.47325	0.446246	0.53577	0.433731	0.53577	0.622877	0.48138	0.383726	0.363582	0.501859	0.512208	0.373659	0.795297	0.469135	0.43054	0.461261	0.416455	0.495757	0.382452	0.623266	0.436345
#ZS15	0.483069	0.480517	0.441105	0.425313	0.469316	0.418531	0.49845	0.450279	0.568741	0.412526	0.476834	0.43639	0.562447	0.580231	0.599588	0.43639	0.459289	0.431759	0.441105	0.473895	0.431759	0.531917	0.449067	0.380689	0.412526	0.470301	0.310398	0.50205	0.524618	0.306581	0.262994	0.167342	0.405618	0.4495	0.250326	0.761577	0.281263	0.368648	0.366915	0.318195	0.462036	0.319744	0.633997	0.435414	0.26856
